# Supplementary material
Source: PubMed Central journal article supplement (PMC3299818)
Supplement: NIHMS339866-supplement-01.pdf [file NIHMS339866-supplement-01.pdf]

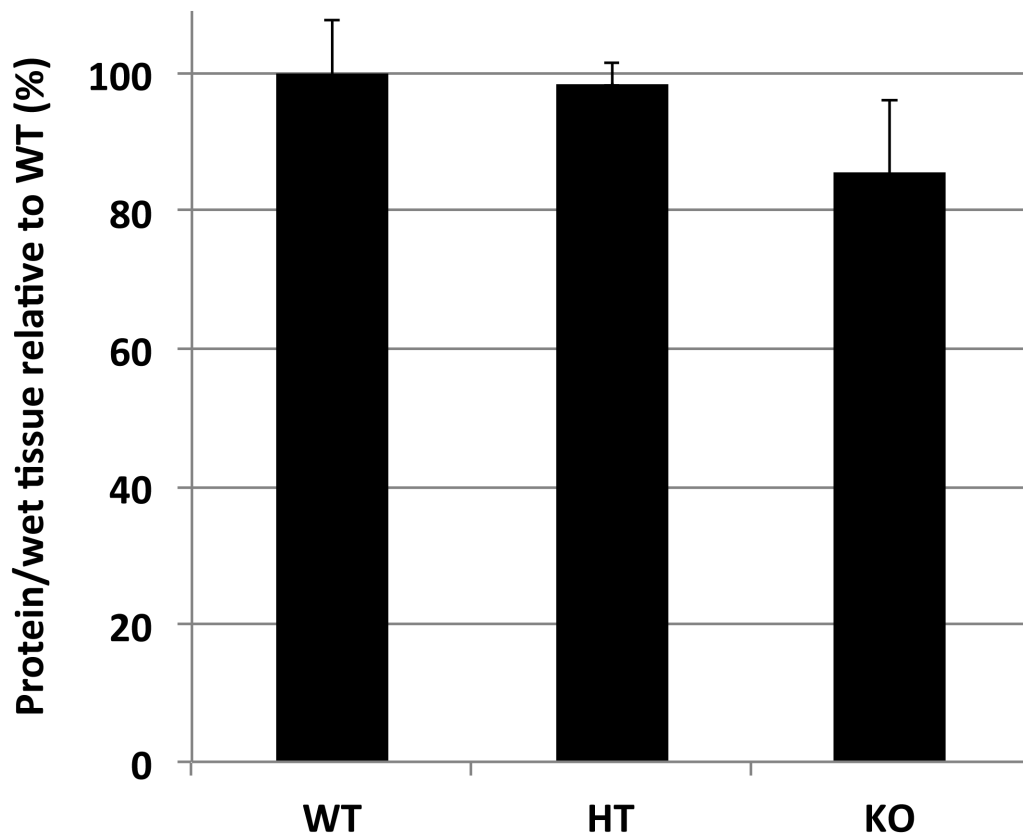

*Supplementary Figure 1.* *Cox7a1* knockout mice showed a trend towards reduced protein content per wet tissue weight with an average reduction of 13% in comparison to wild-type ( $p=0.07$ ;  $n=4$ ).
